# Supplementary material
Source: MDPI journal article supplement (https://www.mdpi.com/2076-3417/11/13/6163)
Supplement: s1 [file s1]

Archive with 7 entries (7 files):
- Figure S1 .tiff
- Figure S2.tiff
- Figure S3.tiff
- Figure S4.pdf
- Figure S5.pdf
- Supplemental Figure Captions.pdf
- Table S1.pdf
