# Supplementary material
Source: MDPI journal article supplement (https://www.mdpi.com/2076-3417/11/13/6163)
Supplement: s1 [file s1 › Table S1.pdf]

**Table S1.** Carbonate dissolution test.

| Strain  | Species                                           | CaCO <sub>3</sub><br>solubilization |
|---------|---------------------------------------------------|-------------------------------------|
| Nord A  | <i>Parengyodontium album</i>                      | -                                   |
| NT-N-8  | <i>Aspergillus niger</i> / <i>A. welwitschiae</i> | +                                   |
| NT-N-10 | <i>Cladosporium cladosporioides</i>               | +                                   |
| NT-N-11 | <i>Epicoccum nigrum</i>                           | -                                   |
| NT-N-13 | <i>Pithomyces (Leptosphaerulina) chartarum</i>    | -                                   |
| NT-N-14 | <i>Aspergillus niger</i>                          | +                                   |
| NT-N-17 | <i>Alternaria alternata</i>                       | -                                   |
| NT-N-21 | <i>Alternaria alternata</i> / <i>A. malvae</i>    | -                                   |
| SB      | <i>Epicoccum nigrum</i>                           | -                                   |
| SO      | <i>Aureobasidium pullulans</i>                    | +                                   |
| Sud P   | <i>Aureobasidium pullulans</i>                    | +                                   |
| NT-S-6  | <i>Cladosporium ramotenellum</i>                  | -                                   |

+ = able to degrade calcium carbonate; - = unable to degrade calcium carbonate
