# Supplementary material
Source: MDPI journal article supplement (https://www.mdpi.com/2076-3417/11/13/6163)

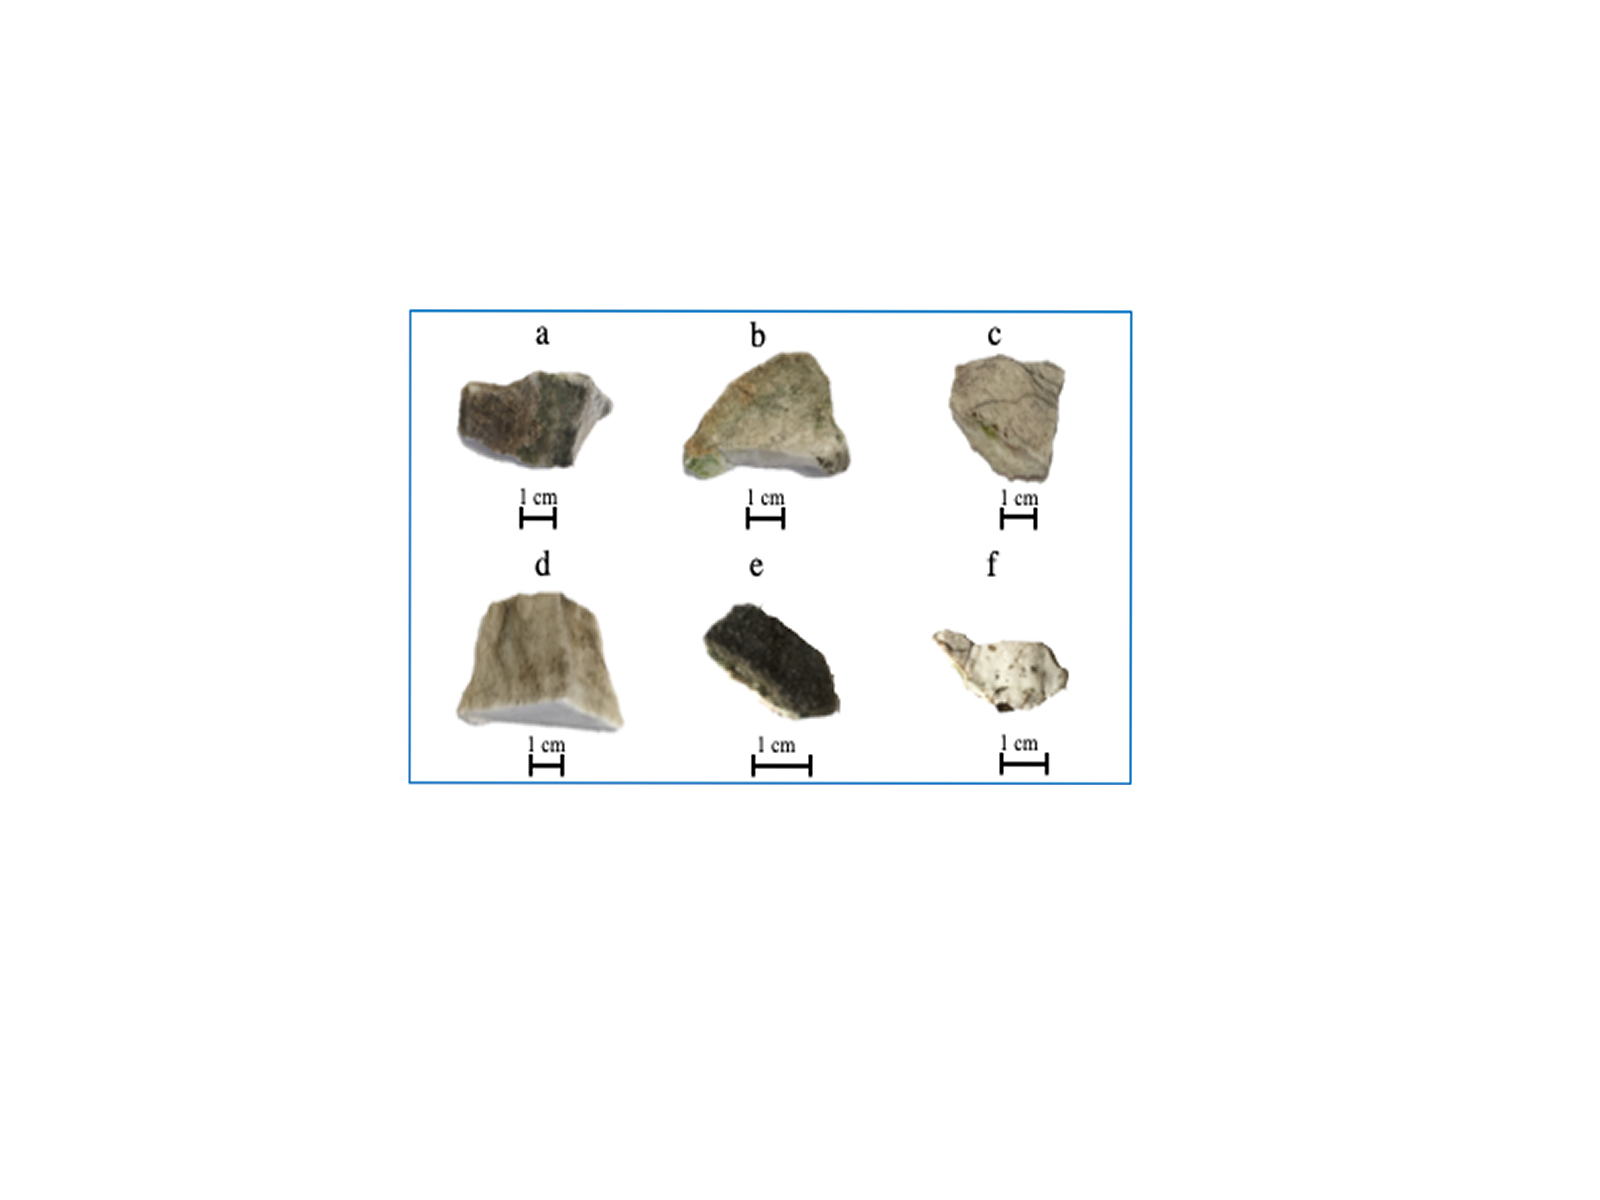

Supplement: s1 [file s1 › Figure S1 .tiff]

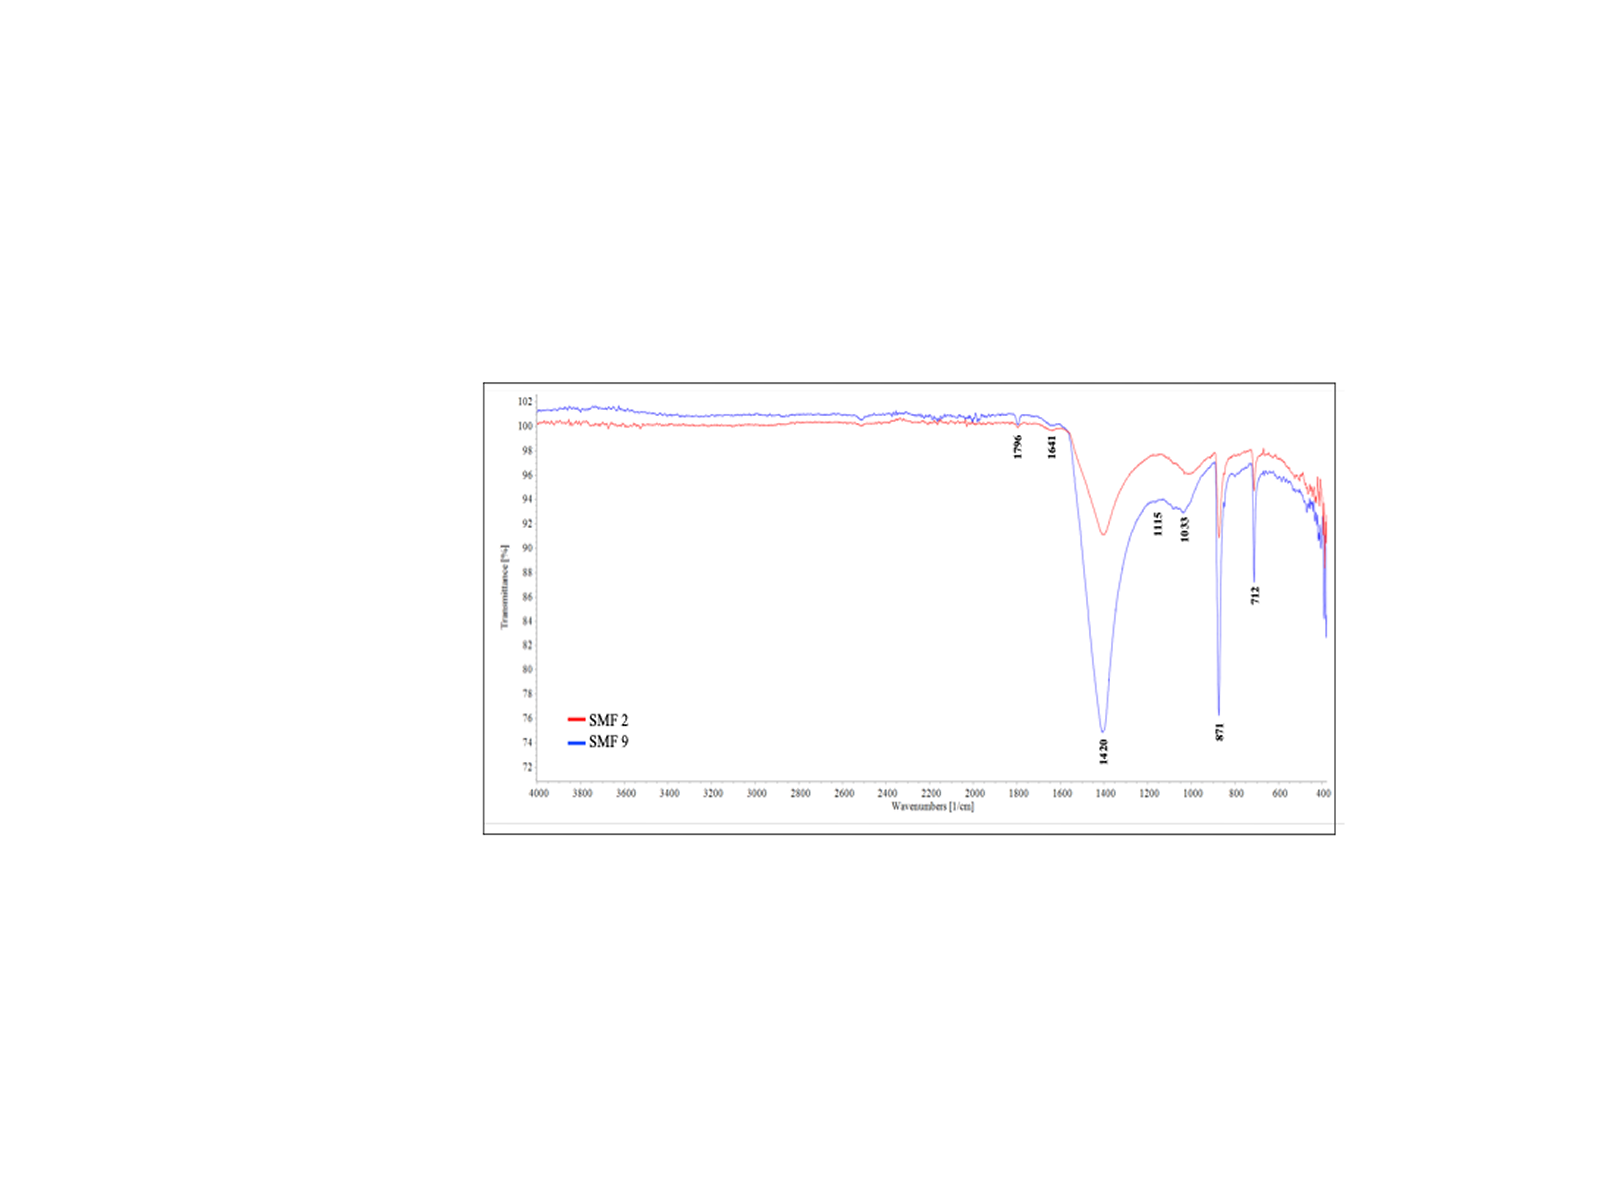

Supplement: s1 [file s1 › Figure S2.tiff]

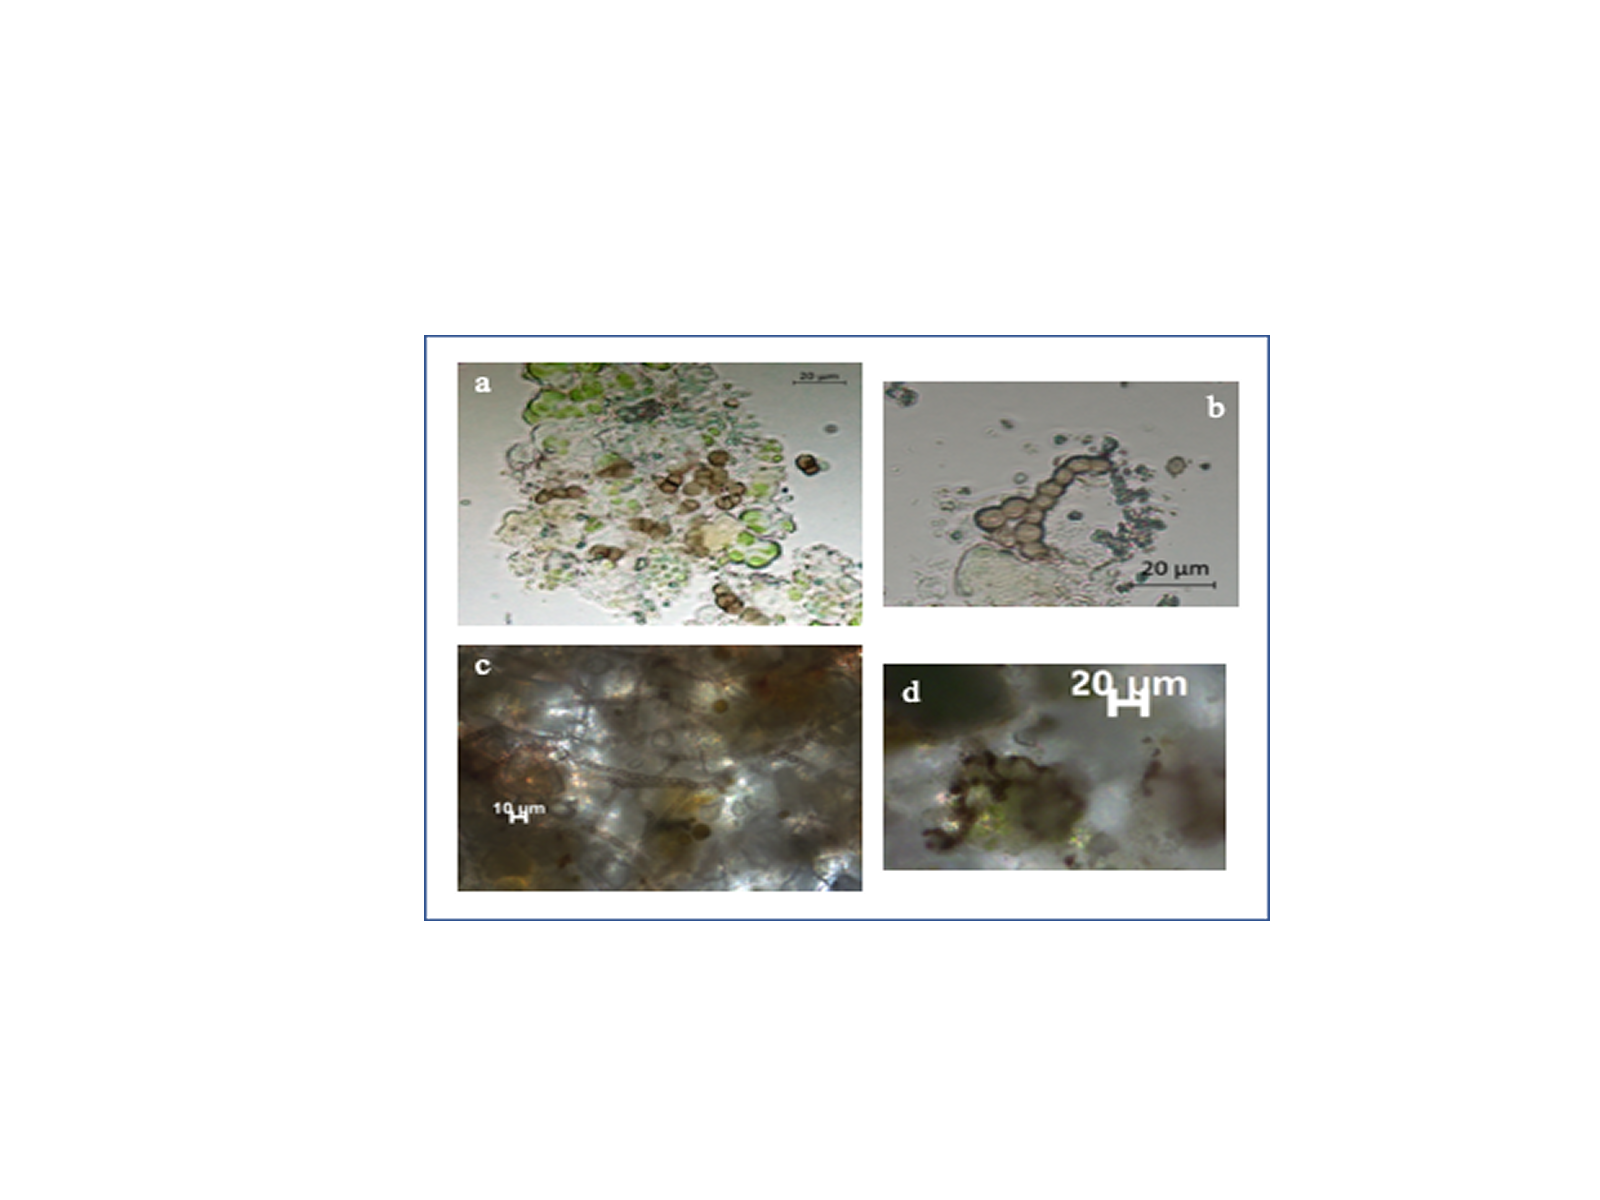

Supplement: s1 [file s1 › Figure S3.tiff]

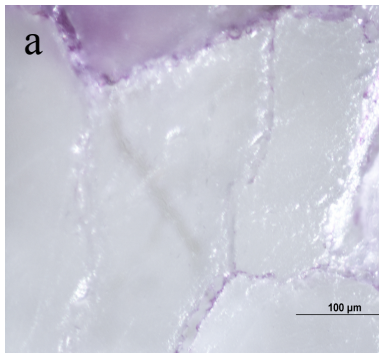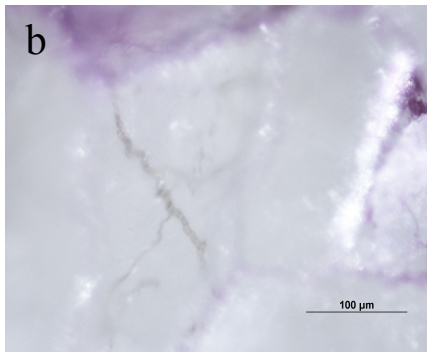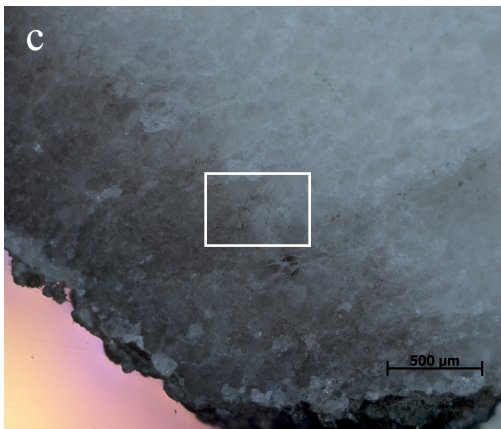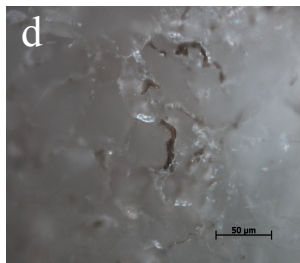

Supplement: s1 [file s1 › Figure S4.pdf]

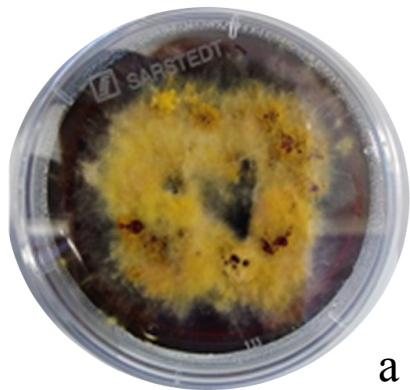

a

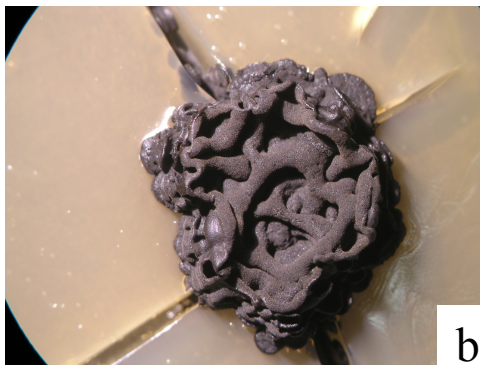

b

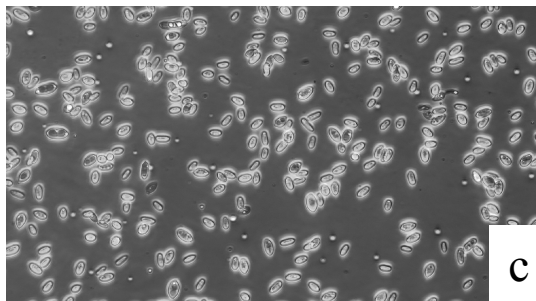

c

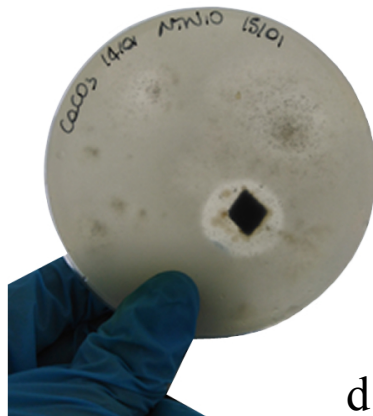

d

Supplement: s1 [file s1 › Figure S5.pdf]
